# Supplementary material for: A nitrogen-doped amorphous/graphitic hybrid carbon material derived from a sustainable resource for low-cost K-ion battery anodes
Source: Royal Society of Chemistry journal article supplement (doi:10.1039/d2ta04195b), 2022-01-01
Supplement: d2ta04195b1.pdf [file d2ta04195b1.pdf]

## Supplementary Material

### Nitrogen-doped amorphous/graphitic hybrid carbon material derived from sustainable resource for low-cost K-ion battery anode

Yeseul Jeong,<sup>1,#</sup> Hyeon-Ji Shin,<sup>2,3,#</sup> Gwangeon Oh,<sup>1</sup> Muhammad Hilmy Alfaruqi,<sup>1</sup> Mohammad Shamsuddin Ahmed,<sup>1</sup> Vinod Mathew,<sup>1</sup> Hun-Gi Jung,<sup>2,3,\*</sup> Jaekook Kim,<sup>1,\*</sup> Jang-Yeon Hwang<sup>1,\*</sup>

<sup>1</sup>Department of Materials Science and Engineering, Chonnam National University, Gwangju 61186, Republic of Korea

<sup>2</sup>Energy Storage Research Center, Clean Energy Research Division, Korea Institute of Science and Technology, Seoul 02792, Republic of Korea

<sup>3</sup>Division of Energy and Environment Technology, KIST School, Korea University of Science and Technology, Seoul 02792, Republic of Korea

#### Author Information

#These authors contribute equally to this work.

#### Corresponding Author

\*E-mail: [hungi@kist.re.kr](mailto:hungi@kist.re.kr); [jaekook@jnu.ac.kr](mailto:jaekook@jnu.ac.kr); [hjy@jnu.ac.kr](mailto:hjy@jnu.ac.kr)

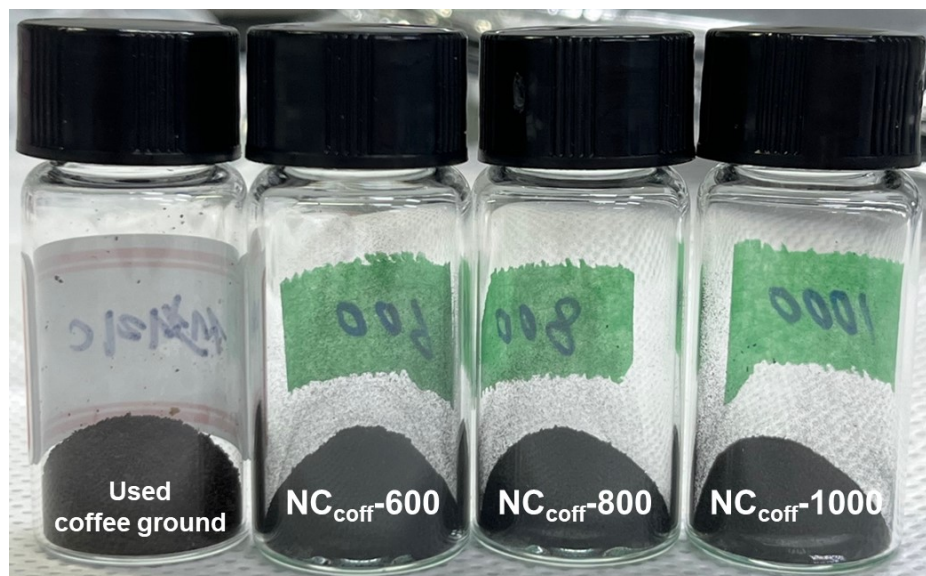

**Fig. S1** A comparison photograph of the used coffee ground before / after the pyrolysis process.

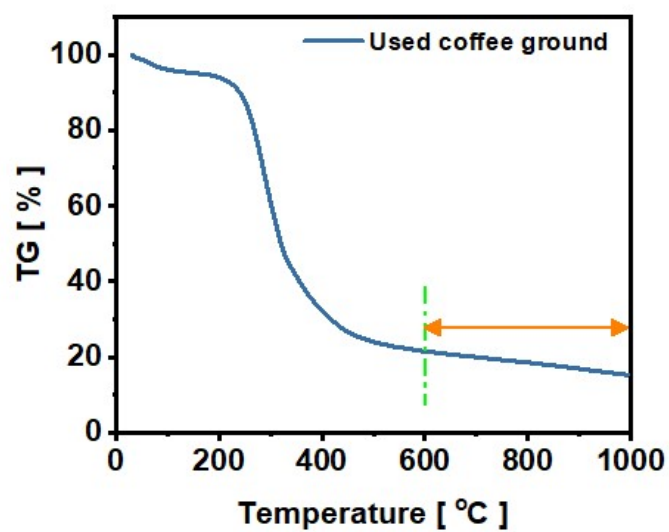

**Fig. S2** Thermogravimetric analysis of used coffee ground up to 1000 °C under Ar-atmosphere.

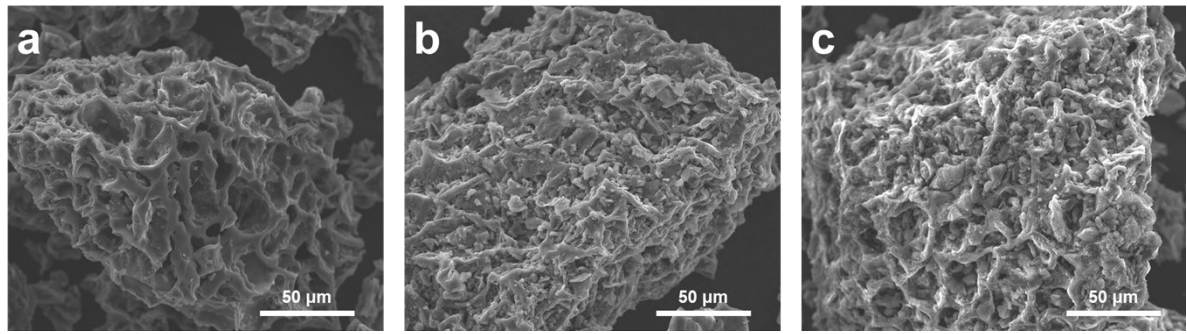

**Fig. S3** Low magnification SEM images of (a)  $\text{NC}_{\text{coff-600}}$ , (b)  $\text{NC}_{\text{coff-800}}$ , and (c)  $\text{NC}_{\text{coff-1000}}$ .

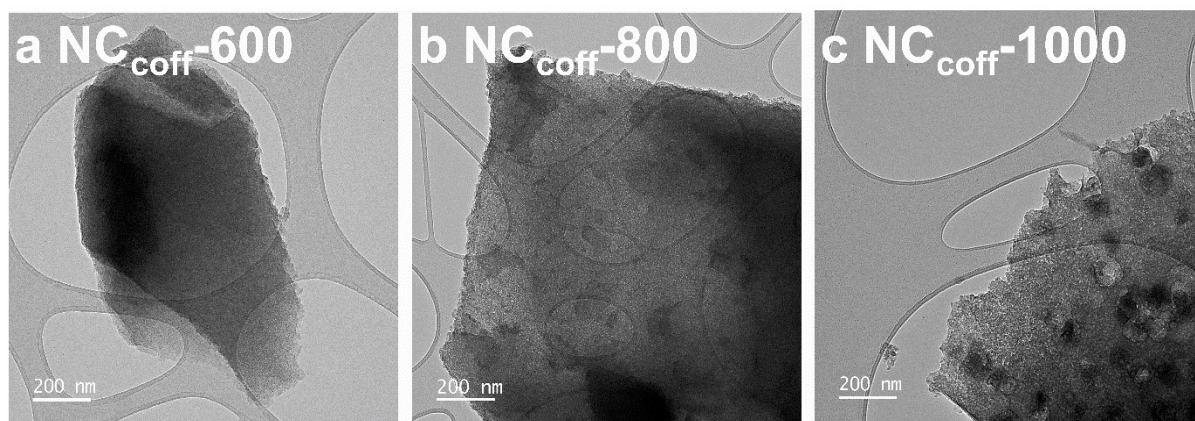

**Fig. S4** Transmission electron microscopy (TEM) images of (a) NC<sub>coff</sub>-600, (b) NC<sub>coff</sub>-800, and (c) NC<sub>coff</sub>-1000.

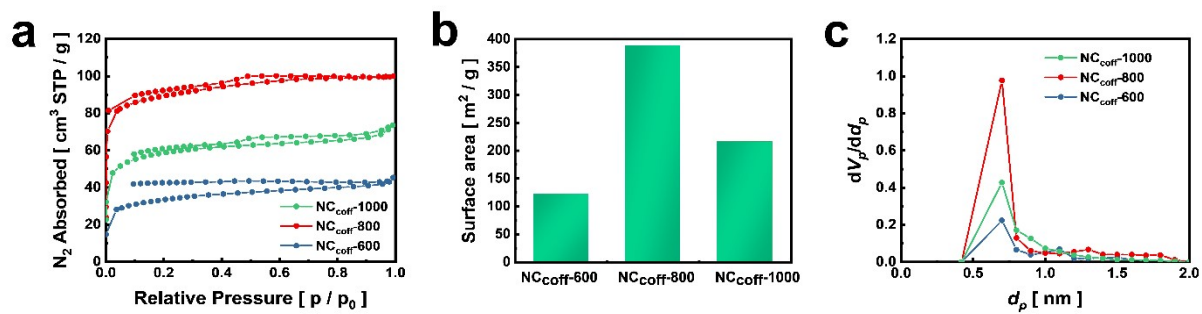

**Fig. S5** Comparative (a) N<sub>2</sub>-adsorption-desorption isotherms, (b) Brunauer-Emmett-Teller (BET) surface area histograms, and (c) Barrett-Joyner-Halenda (BJH) pore-size distribution plots of NC<sub>coff</sub>-600, NC<sub>coff</sub>-800, and NC<sub>coff</sub>-1000.

**Table S1.** Surface area and porosity features of the NC<sub>coff</sub> samples.

| Sample                   | $a_{s, \text{BET}}$<br>(m <sup>2</sup> g <sup>-1</sup> ) | Total pore volume<br>(p/p <sub>0</sub> = 0.990) (cm <sup>3</sup> g <sup>-1</sup> ) | Micropore<br>volume<br>(cm <sup>3</sup> g <sup>-1</sup> ) | Mesopore<br>volume<br>(cm <sup>3</sup> g <sup>-1</sup> ) | Micropore<br>size<br>(nm) |
|--------------------------|----------------------------------------------------------|------------------------------------------------------------------------------------|-----------------------------------------------------------|----------------------------------------------------------|---------------------------|
| NC <sub>coff</sub> -600  | 121.39                                                   | 0.069491                                                                           | 0.057779                                                  | 0.027397                                                 | 0.7                       |
| NC <sub>coff</sub> -800  | 338.65                                                   | 0.1545                                                                             | 0.1604                                                    | 0.03079                                                  | 0.7                       |
| NC <sub>coff</sub> -1000 | 215.88                                                   | 0.1134                                                                             | 0.098935                                                  | 0.033742                                                 | 0.7                       |

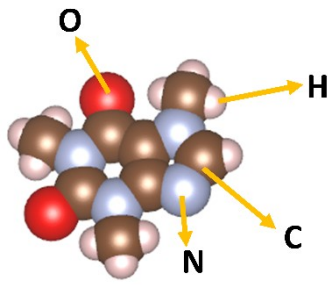

**Fig. S6** Chemical structure of caffeine.



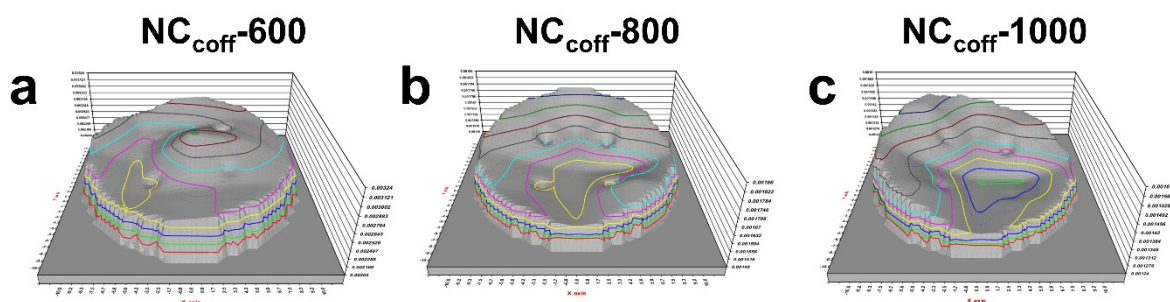

**Fig. S7** Electrical conductivity measured via the 4-point probe direct current (DC) method as shown by 3D resistance mapping for three  $NC_{\text{coff}}$  electrodes.

The resistivity and electrical conductivity of the  $NC_{\text{coff}}$  electrodes in relation to the heat treatment temperature were measured at 25 °C (room temperature) via the 4-point probe DC method. The resistance of the electrode (diameter: 16 mm), shown on the x–y plane, is presented as a 3D contour line. It was confirmed that the resistance values of each sample were similar across all points, specifically the 3-D contour of (a)  $NC_{\text{coff-600}}$ , (b)  $NC_{\text{coff-800}}$ , and (c)  $NC_{\text{coff-1000}}$ . The x- and y-axes indicate position, and the z-axis indicates resistance. Detailed values of average resistivity and electrical conductivity are summarized in Table S2.

**Table S2.** Corresponding average resistivity and electrical conductivity depicted in Figure S4.

| Sample                  | Avg (ohm·cm)          | Conductivity       |
|-------------------------|-----------------------|--------------------|
| $NC_{\text{coff-600}}$  | $3.23 \times 10^{-5}$ | $3.09 \times 10^4$ |
| $NC_{\text{coff-800}}$  | $1.44 \times 10^{-5}$ | $6.96 \times 10^4$ |
| $NC_{\text{coff-1000}}$ | $2.19 \times 10^{-5}$ | $4.57 \times 10^4$ |

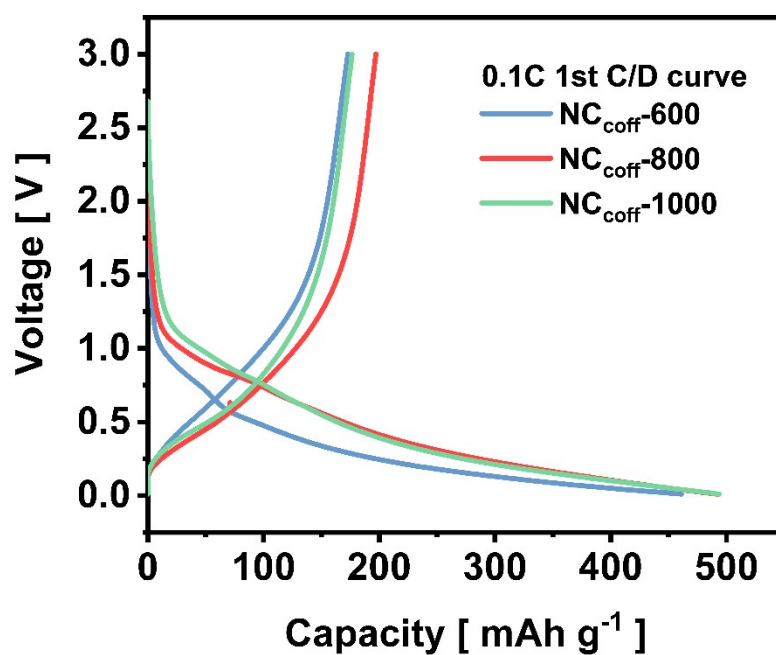

**Fig. S8** Charge–discharge voltage profiles of NC<sub>coff</sub> anode half-cell with the first cycle at 0.1 C in the voltage range of 0.01–3 V (vs. K/K<sup>+</sup>).

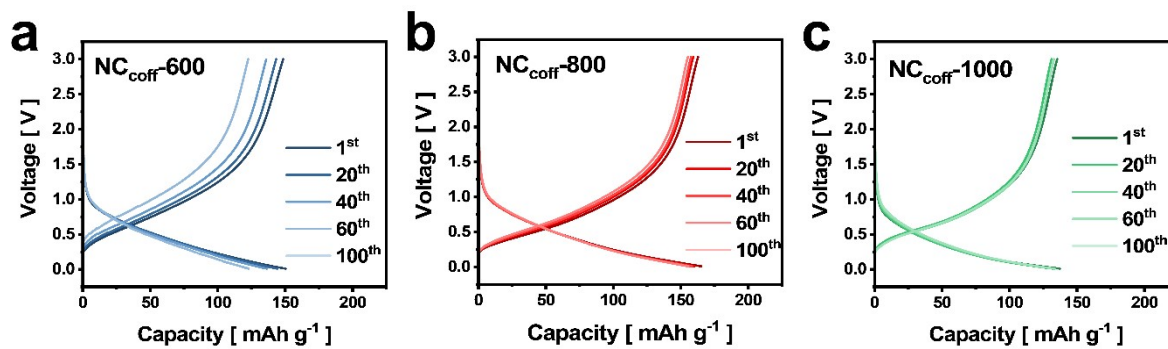

**Fig. S9** Charge–discharge voltage profiles of the NC<sub>coff</sub> anode half-cell with the 1<sup>st</sup>, 20<sup>th</sup>, 40<sup>th</sup>, 60<sup>th</sup>, and 100<sup>th</sup> cycle of 0.2 C for (a) NC<sub>coff</sub>-600, (b) NC<sub>coff</sub>-800, and (c) NC<sub>coff</sub>-1000 in the voltage range of 0.01–3 V (vs. K/K<sup>+</sup>).

**Table S3.** The diffusion coefficients ( $D_{K^+}$ ) calculated for the electrodes after 15 cycles.

| Sample                   | Diffusion coefficient ( $D_{K^+}$ )               |
|--------------------------|---------------------------------------------------|
| NC <sub>coff</sub> -600  | $0.74 \times 10^{-9} \text{ cm}^2 \text{ s}^{-1}$ |
| NC <sub>coff</sub> -800  | $1.19 \times 10^{-9} \text{ cm}^2 \text{ s}^{-1}$ |
| NC <sub>coff</sub> -1000 | $0.58 \times 10^{-9} \text{ cm}^2 \text{ s}^{-1}$ |

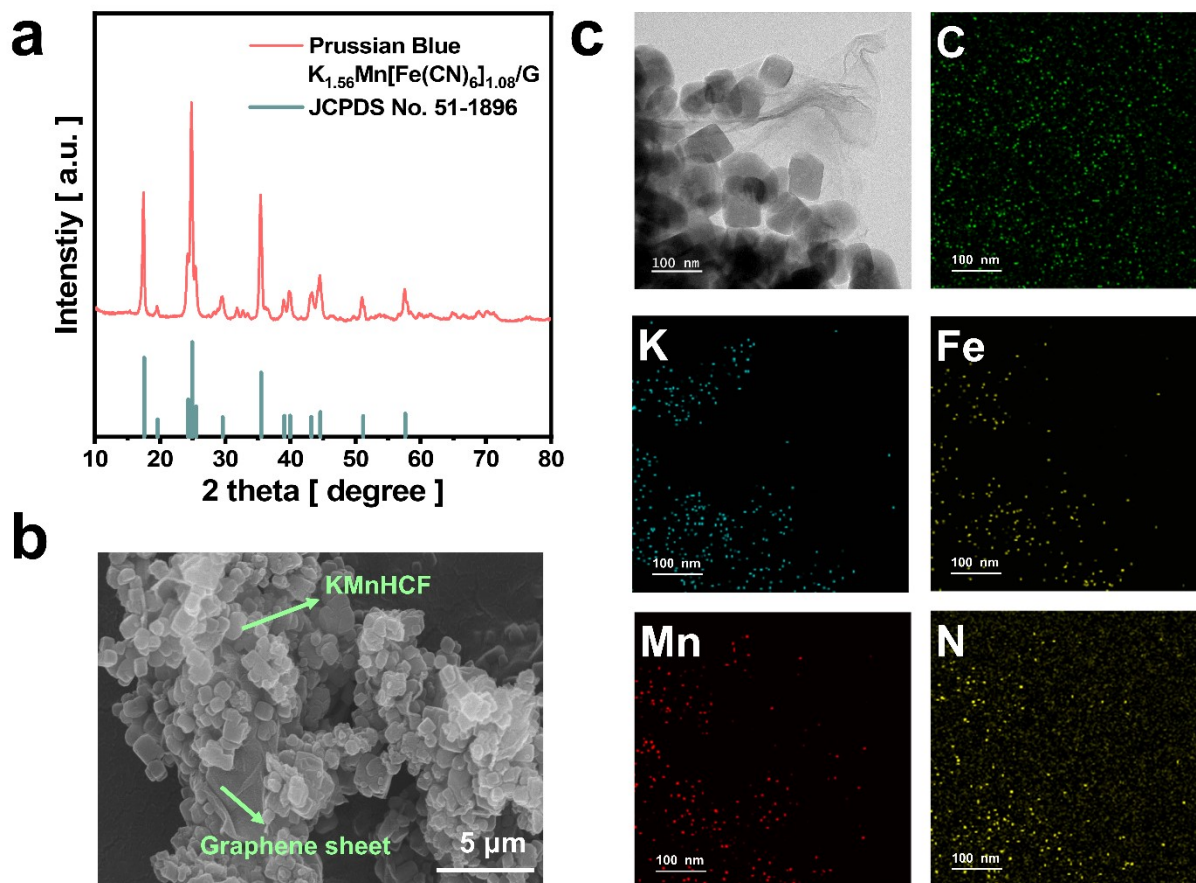

**Fig. S10** (a) X-ray diffraction (XRD) results, (b) scanning electron microscopy (SEM) image, and (c) transmission electron microscopy (TEM) image of the synthesized Prussian blue/graphene (PB/G) composite cathode for full-cell measurements and the corresponding energy dispersive X-ray spectroscopy (EDX) mapping images.

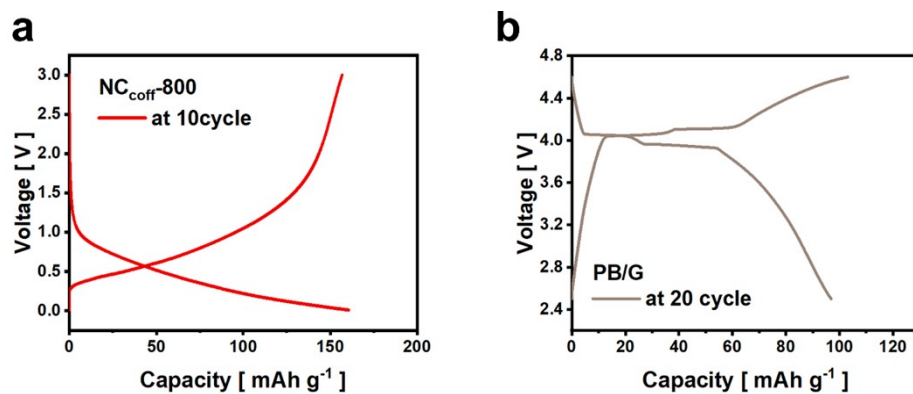

**Fig. S11** Charge–discharge voltage profiles tested with (a) NC<sub>coff</sub>-800 and (b) PB/G half cell at 0.1 C rate for 10 and 20 cycles as pre-cycling prior to configuring the full-cell. The voltage ranges measured for the PB/G cathode and NC<sub>coff</sub>-800 anode are 2.5–4.6 V (vs. K/K<sup>+</sup>) and 0.01–3 V (vs. K/K<sup>+</sup>), respectively.

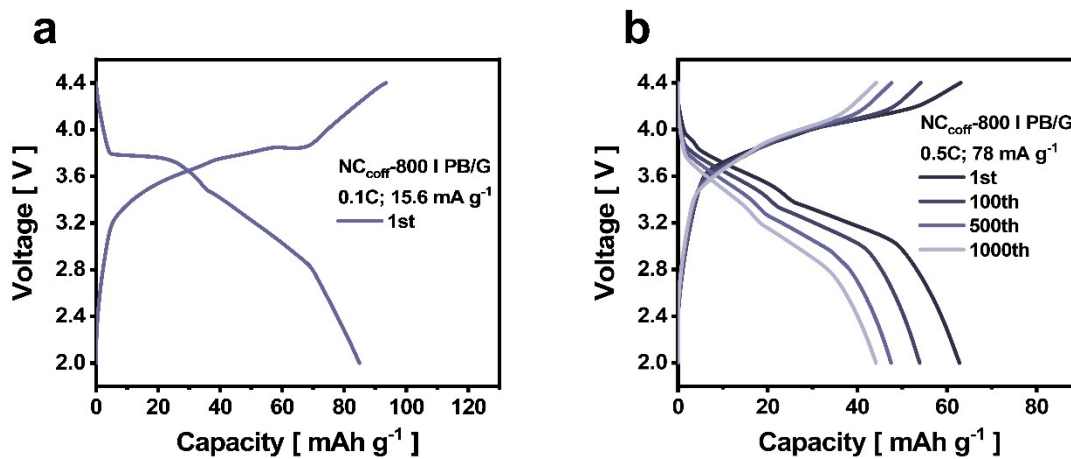

**Fig. S12** Charge–discharge voltage profiles of the  $\text{NC}_{\text{coff-800}} | \text{PB/G}$  full-cell with 1<sup>st</sup>, 100<sup>th</sup>, 500<sup>th</sup>, 1000<sup>th</sup> cycle of 0.5 C in the voltage range 2.0–4.4 V.

**Table S4.** Summary of biomass-derived carbon for potassium-ion batteries.

| Anode materials    | Synthesis method                                                                                   | SSA (m <sup>2</sup> g <sup>-1</sup> ) | Electrolyte                                | Current density (mA g <sup>-1</sup> ) | Voltage range (V) | Initial capacity (mAh g <sup>-1</sup> ) | Capacity retention               | Diffusion-controlled reaction from CV (%) | Full cell                                                   | Ref.      |
|--------------------|----------------------------------------------------------------------------------------------------|---------------------------------------|--------------------------------------------|---------------------------------------|-------------------|-----------------------------------------|----------------------------------|-------------------------------------------|-------------------------------------------------------------|-----------|
| Used coffee ground | 800 °C 5h Ar                                                                                       | 338.65                                | 0.5 M KPF <sub>6</sub> in EC:DEC (1:1 v/v) | 40                                    | 0.01 – 3          | 170.3                                   | 90.4 % @ 100 cycles              | 47 at 15 mV / s                           | KMn[Fe(CN) <sub>6</sub> ] / G<br>C. E.; 99.9% @ 1000 cycles | This work |
| Bamboo charcoal    | Activating agent (KOH) + 700 °C 2 h at N <sub>2</sub> + sulfur mixture + 700 °C 2 h N <sub>2</sub> | 336.4                                 | 0.8 M KPF <sub>6</sub> in EC:DEC (1:1 v/v) | 200                                   | 0.01 - 3          | 155                                     | 131.5 % @ 300 cycles             | N/A                                       | N/A                                                         | [1]       |
| Chitin             | 700 °C 2 h Ar                                                                                      | 309.45                                | 0.8 M KPF <sub>6</sub> in EC:DEC (1:1 v/v) | 56                                    | 0.01 – 2          | 240                                     | 86.1% @ 200 cycles               | N/A                                       | N/A                                                         | [2]       |
| Soybean roots      | Activating agent (HCl) + 700 °C 2 h Ar                                                             | 10.5                                  | 0.8 M KPF <sub>6</sub> in EC:DEC (1:1 v/v) | 1000                                  | 0.01 - 3          | 330                                     | 80 % @ 500 cycles                | 20.2 at 2 mV / s                          | N/A                                                         | [3]       |
| Potato             | 1000 °C 2 h Ar                                                                                     | 531.67                                | 3 M KFSI in DME                            | 100                                   | 0.01 – 2.7        | 270.2                                   | 91.7 % @ 100 cycles <sup>1</sup> | N/A                                       | N/A                                                         | [4]       |
| Cyanobacteria      | Activating agent (KCl + NaCl) + 800 °C 3 h                                                         | 473.7                                 | 0.8 M KPF <sub>6</sub> in EC:DMC (1:1 v/v) | 50                                    | 0.01 – 3          | 352                                     | 75.6 % @ 100 cycles              | N/A                                       | N/A                                                         | [5]       |
| Oak                | 1100 °C 6 h Ar                                                                                     | 156                                   | 0.4 M KPF <sub>6</sub> in EC:DEC (1:1 v/v) | 100                                   | 0.01 – 3          | 144.5                                   | 93.4 % @ 150 cycles              | N/A                                       | N/A                                                         | [6]       |
| Loofah             | Activating agent (KOH) + 1000 °C 2 h N <sub>2</sub>                                                | 270                                   | 1 M KPF <sub>6</sub> in EC:DMC (1:1 v/v)   | 100                                   | 0.01 – 3          | 155                                     | 96.8 % @ 200 cycles              | N/A                                       | N/A                                                         | [7]       |
| Walnut septum      | Urea solution + 800 °C 2 h Ar                                                                      | 99.6                                  | 0.8 M KPF <sub>6</sub> in EC:DEC (1:1 v/v) | 100                                   | 0.005 - 3         | 263.6                                   | 92 % @ 200 cycles                | 17 at 1 mV / s                            | N/A                                                         | [8]       |
| Sugar cane         | Activating agent (KOH) + 800 °C 2 h N <sub>2</sub> + 900 °C 2 h N <sub>2</sub>                     | 425.1                                 | 0.8 M KPF <sub>6</sub> in EC:DMC (1:1 v/v) | 100                                   | 0.01 – 2.5        | 463                                     | 65.7 % @ 100 cycles              | N/A                                       | N/A                                                         | [9]       |
| Artemisia Hedinii  | Activating agent (KOH) + 800 °C 1 h N <sub>2</sub>                                                 | 1196                                  | 0.8 M KPF <sub>6</sub> in EC:DEC (1:1 v/v) | 69.75                                 | 0.01 – 3          | 116.4                                   | 94.5 % @ 500 cycles              | 38.2 at 1 mV / s                          | N/A                                                         | [10]      |
| Skimmed cotton     | 850 °C Ar + sulfur mixture                                                                         | 612                                   | 1 M KPF <sub>6</sub> in DME                | 1000                                  | 0.01 – 2          | 194                                     | 90.2 % @ 100 cycles              | N/A                                       | N/A                                                         | [11]      |
| Corn stalks        | Urea solution + 275 °C 6 h Ar + 1200 °C 2 h Ar                                                     | 130.8                                 | 0.8 M KPF <sub>6</sub> in EC:DEC (1:1 v/v) | 1000                                  | 0.01 – 2.5        | 200                                     | 88 % @ 260 cycles                | N/A                                       | N/A                                                         | [12]      |
| Chicken bones      | Activating agent (HNO <sub>3</sub> ) 450 °C Ar + 850 °C 1 h Ar                                     | 1474.5                                | 1 M KPF <sub>6</sub> in EC:DEC (1:1 v/v)   | 58                                    | 0.01 - 3          | 470                                     | 43.6 % @ 450 cycles              | N/A                                       | N/A                                                         | [13]      |



|                |                                                                      |        |                                            |     |          |       |                     |                  |                                                     |      |
|----------------|----------------------------------------------------------------------|--------|--------------------------------------------|-----|----------|-------|---------------------|------------------|-----------------------------------------------------|------|
| Skimmed cotton | Activating agent (HCl) + 900 °C 2 h Ar + 1200 °C 2 h Ar              | 354    | 1 M KPF <sub>6</sub> in DME                | 200 | 0–2.5    | 240   | 92 % @ 150 cycles   | 32 at 1 mV / s   | KFe[Fe(CN) <sub>6</sub> ]<br>C. E.; 97% @ 80 cycles | [14] |
| Gelatin        | 800 °C 1 h Ar                                                        | N/A    | 1 M KPF <sub>6</sub> in EC:DEC (1:1 v/v)   | 200 | 0.01 - 3 | 92    | 89.3 % @ 300 cycles | 43.3 at 1 mV / s | N/A                                                 | [15] |
| Orange peel    | Activating agent (HCl) + 1000 °C 2 h N <sub>2</sub> + 350 °C 3 h air | 113.86 | 0.8 M KPF <sub>6</sub> in EC:DEC (1:1 v/v) | 50  | 0.01 - 3 | 320.8 | 80.9 % @ 150 cycles | N/A              | N/A                                                 | [16] |
| Dandelion seed | Activating agent (KOH) + 800 °C 2 h Ar                               | 1303   | 0.8 M KPF <sub>6</sub> in EC:DEC (1:1 v/v) | 50  | 0.01 - 3 | 243   | 91 % @ 100 cycles   | N/A              | N/A                                                 | [17] |

## References

- [1] S. Tian, D. Guan, J. Lu, Y. Zhang, T. Liu, X. Zhao, C. Yang and J. Nan, *J. Power Sources*, 2020, **448**, 227572.
- [2] R. Hao, H. Lan, C. Kuang, H. Wang and L. Guo, *Carbon*, 2018, **128**, 224–230.
- [3] S. Tao, W. Xu, J. Zheng, F. Kong, P. Cui, D. Wu, B. Qian, S. Chen and L. Song, *Carbon*, 2021, **178**, 233–242.
- [4] W. Cao, E. Zhang, J. Wang, Z. Liu, J. Ge, X. Yu, H. Yang and B. Lu, *Electrochim. Acta*, 2019, **293**, 364–370.
- [5] Y. Sun, H. Xiao, H. Li, Y. He, Y. Zhang, Y. Hu, Z. Ju, Q. Zhuang and Y. Cui, *Chem. - A Eur. J.*, 2019, **25**, 7359–7365.
- [6] S. J. R. Prabakar, S. C. Han, C. Park, I. A. Bhairuba, M. J. Reece, K.-S. Sohn and M. Pyo, *J. Electrochem. Soc.*, 2017, **164**, A2012–A2016.
- [7] Z. Wu, L. Wang, J. Huang, J. Zou, S. Chen, H. Cheng, C. Jiang, P. Gao and X. Niu, *Electrochim. Acta*, 2019, **306**, 446–453.

- [8] C. Gao, Q. Wang, S. Luo, Z. Wang and Y. Zhang, *J. Power Sources*, 2019, **415**, 165–171..
- [9] Z. Zhang, B. Jia, L. Liu, Y. Zhao, H. Wu, M. Qin, K. Han, W. A. Wang, K. Xi, L. Zhang, G. Qi, X. Qu and R. V. Kumar, *ACS Nano*, 2019, **13**, 11363–11371.
- [10] J. Shan, J.-J. Wang, P. Kiekens, Y. Zhao and J.-J. Huang, *Solid State Sci.*, 2019, **92**, 96–105.
- [11] B. Xu, S. Qi, F. Li, X. Peng, J. Cai, J. Liang and J. Ma, *Chinese Chem. Lett.*, 2019, **31**, 217–222.
- [12] W.-J. Deng, X.-D. He, L.-M. Zhang, J.-R. Wang and C.-H. Chen, *Energy Technol.*, 2021, **2100644**, 1–6.
- [13] X. Yuan, B. Zhu, J. Feng, C. Wang, X. Cai and R. Qin, *Mater. Res. Bull.*, 2021, **139**, 111282.
- [14] X. He, J. Liao, Z. Tang, L. Xiao, X. Ding, Q. Hu, Z. Wen and C. Chen, *J. Power Sources*, 2018, **396**, 533–541.
- [15] N. Yang, R. Shao, Z. Zhang, M. Dou and J. Niu, *Carbon*, 2021, **178**, 775–782.
- [16] K. Zhao, C. Chen, M. La and C. Yang, *Micromachines*, 2022, **13**, 806.
- [17] X. Wang, J. Zhao, D. Yao, Y. Xu, P. Xu, Y. Chen, Y. Chen, K. Zhu, K. Cheng, K. Ye, J. Yan, D. Cao, and G. Wang, *J. Electroanal. Chem.*, 2020, **871**, 114272.
